# Supplementary material for: Serum-Free Manufacturing of Mesenchymal Stem Cell Tissue Rings Using Human-Induced Pluripotent Stem Cells
Source: Hindawi journal article supplement (doi:10.1155/2019/5654324), 2019-01-15
Supplement: f1 [file 5654324.f1.pdf]

## SUPPLEMENTARY MATERIALS:

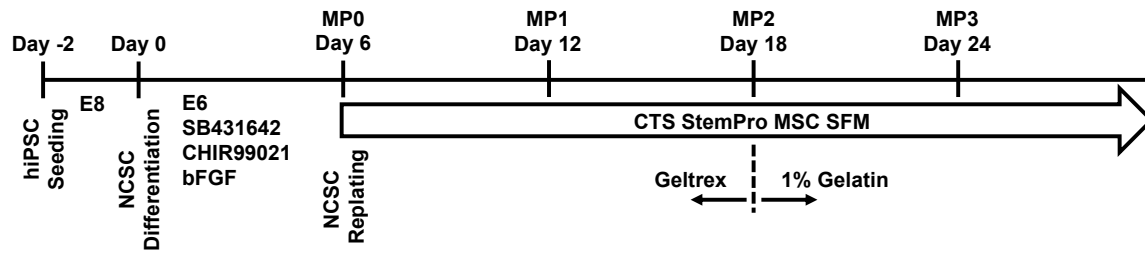

**Supplementary Figure 1:** The differentiation protocol for hiPSC-MSCs through intermediate cell type of NCSCs.

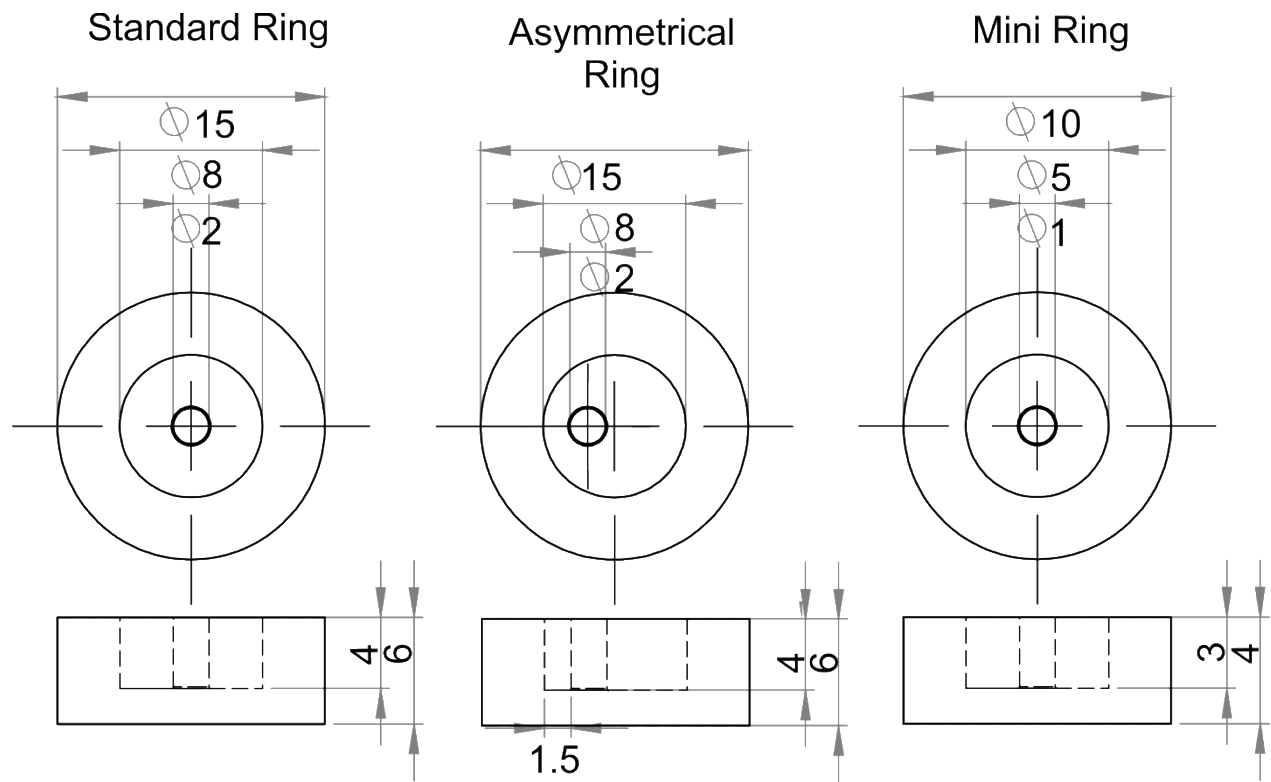

**Supplementary Figure 2:** SolidWork designs for the molds that were used to fabricate standard tissue rings and asymmetrical tissue rings in 24-well plate, and mini tissue rings in 48-well plate.

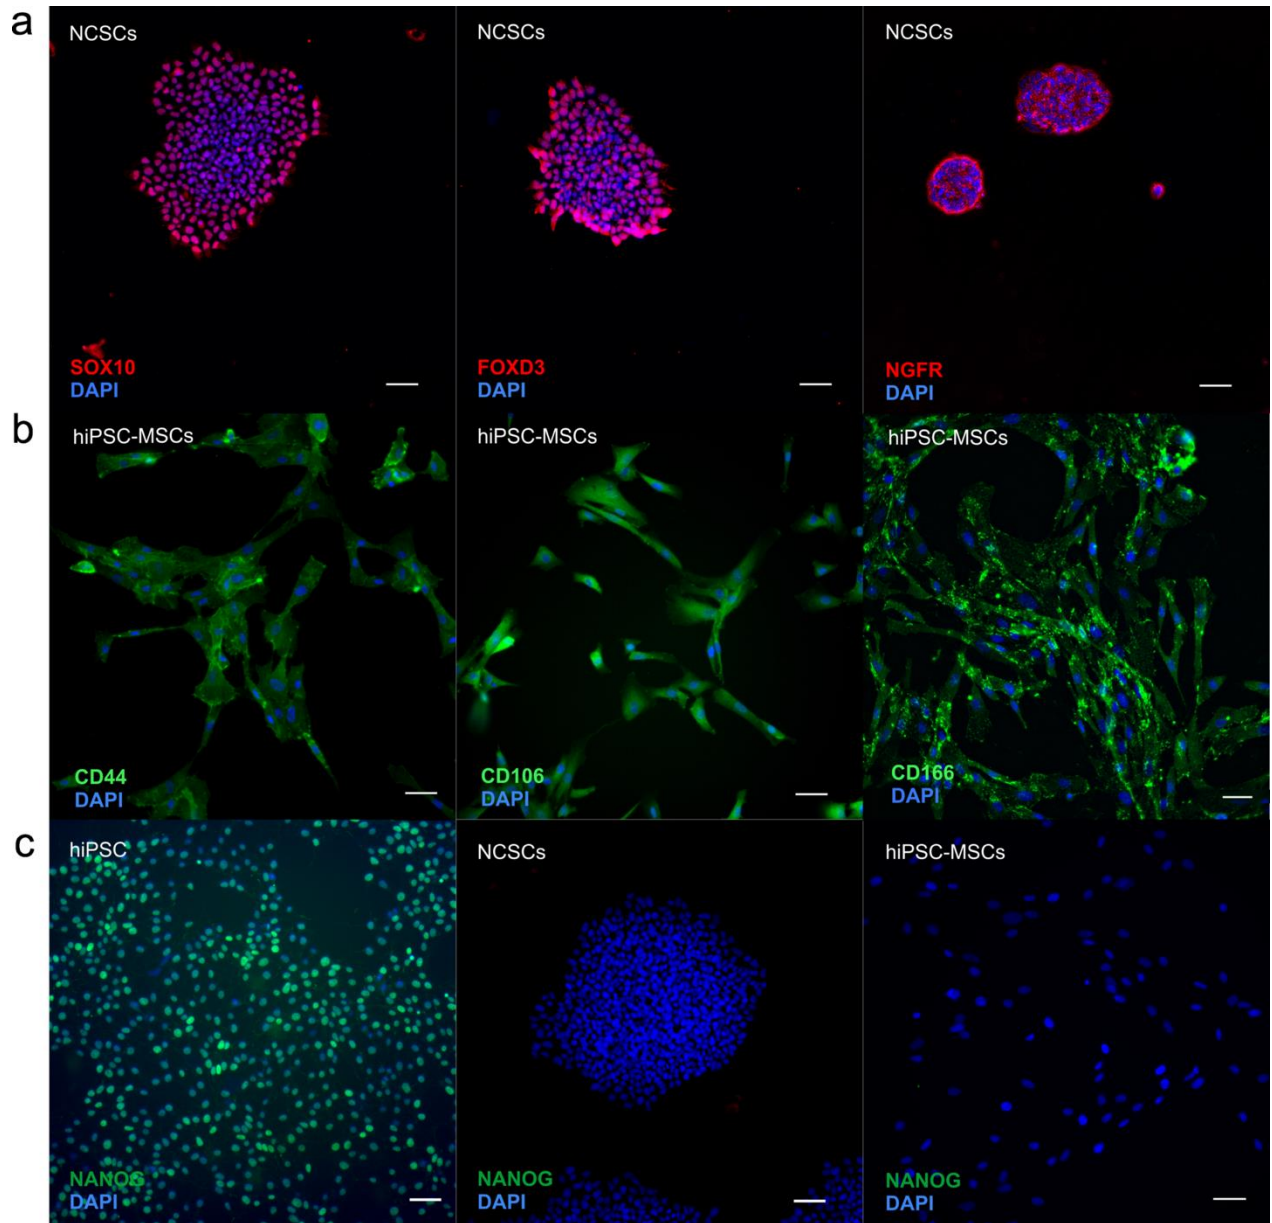

**Supplementary Figure 3:** (a) Intermediate cells expressed NCSC-specific markers of SOX10, FOXD3 and NGFR. (b) hiPSC-MSCs expressed MSC-specific surface markers of CD44, CD106 and CD166. (c) hiPSCs showed high expression of NANOG, but NCSCs and hiPSC-MSCs showed no expression of NANOG. Scale bar: 50 μm.

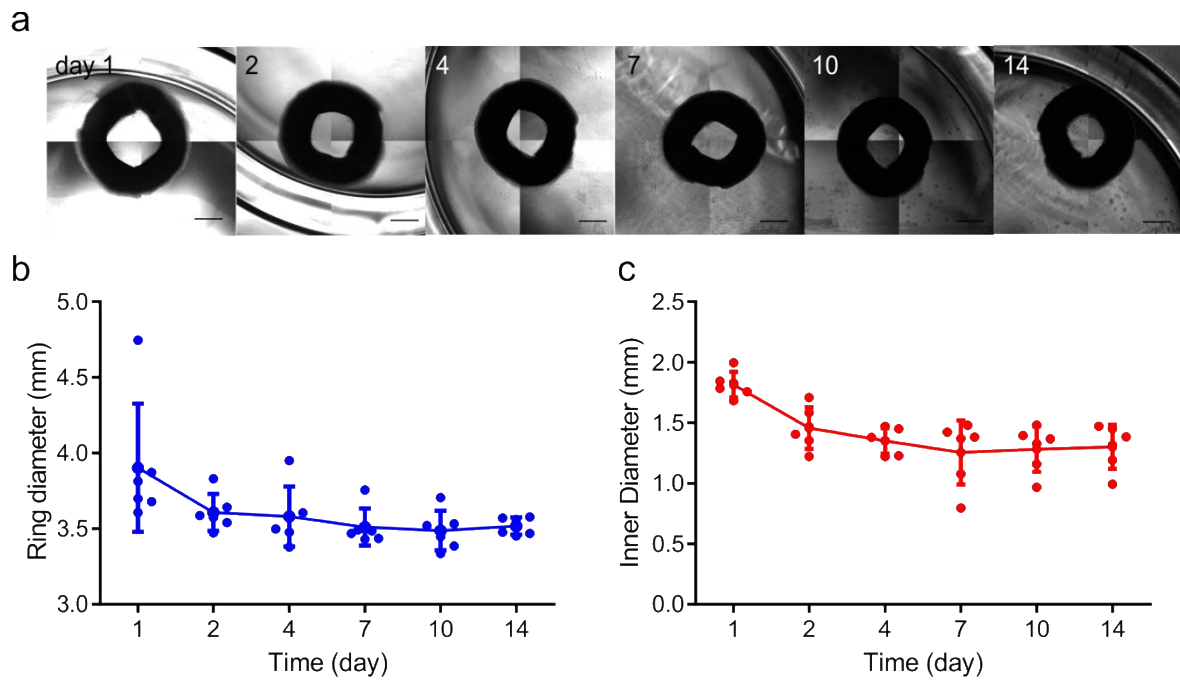

**Supplementary Figure 4: Morphological Changes of Fibroblast Tissue Rings.** (a) The morphology of fibroblast tissue rings after extraction retained the ring shape with consistent (b) outer ring diameter and (c) inner diameter. Scale bar: 1 mm.

**Supplementary Table 1:** The primary antibodies used for immunofluorescent microscopy in this study.

| <b>Antibodies</b> | <b>Markers</b> | <b>Vendors</b>       | <b>Cat #</b> | <b>Dilution</b> |
|-------------------|----------------|----------------------|--------------|-----------------|
| NANOG             | hiPSC          | Life Technologies    | 23D2-3C6     | 1:200           |
| SOX10             | NCSC           | R & D Systems        | MAB2864-SP   | 1:50            |
| FOXD3             | NCSC           | R & D Systems        | AF5090-SP    | 1:20            |
| NGFR              | NCSC           | R & D Systems        | MAB367-SP    | 1:50            |
| CD44              | MSC            | Bio-Rad Laboratories | MCA2726      | 1:100           |
| CD73              | MSC            | Abcam                | ab133582     | 1:50            |
| CD90              | MSC            | Abcam                | ab181469     | 1:200           |
| CD105             | MSC            | Life Technologies    | MA5-11854    | 1:100           |
| CD106             | MSC            | Bio-Rad Laboratories | MCA2297      | 1:100           |
| CD144             | MSC            | Sigma Aldrich        | V1514        | 1:200           |
| CD166             | MSC            | Bio-Rad Laboratories | MCA1926      | 1:100           |
